# Supplementary material
Source: Research Square preprint supplement (doi:10.21203/rs.3.rs-9948396/v1)
Supplement: Supplementary file 1 [file ff353412d87790e9a1f4cb0a.docx]

Supporting Information

**Volumetric Bioprinting of Aqueous Two-Phase Bioinks Enables High-Fidelity Microporous Hydrogel Scaffolds for Volumetric Muscle Loss Repair**


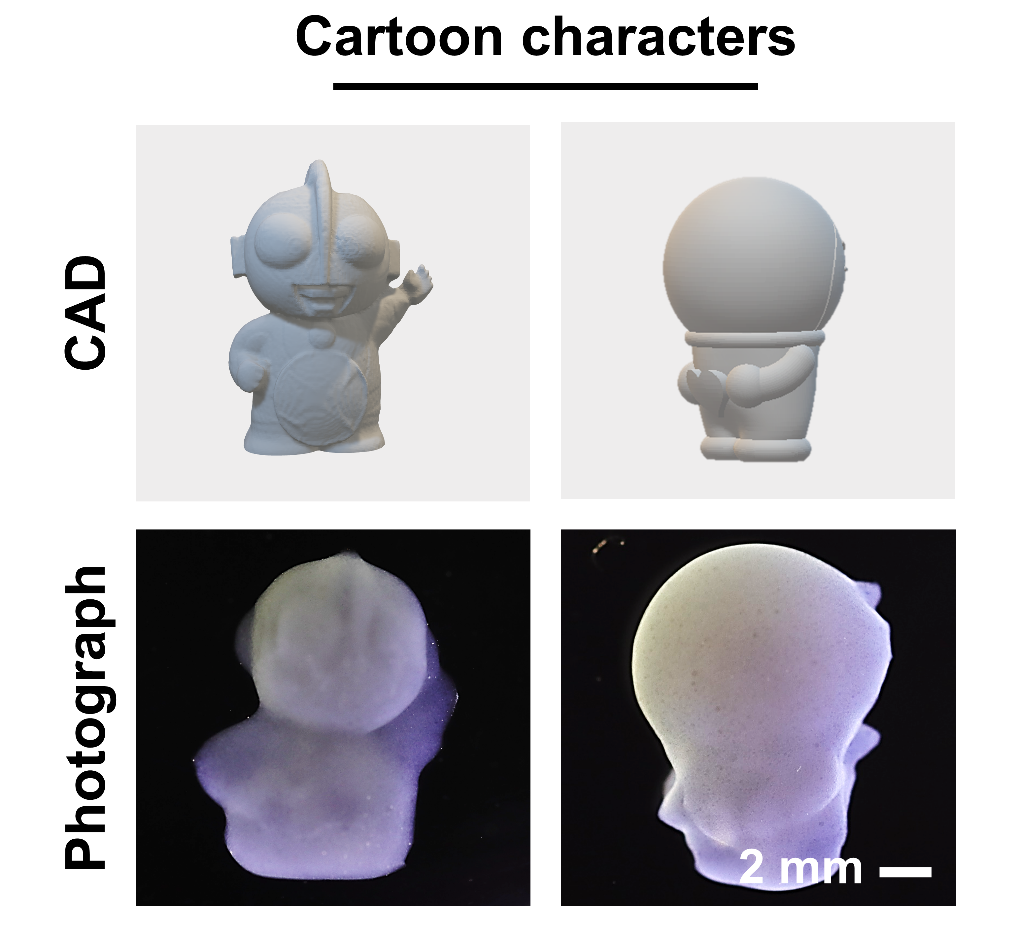


**Figure S1.** Microscopic images ofrepresentative 3D constructs fabricated via VBP using PVA–gelatin emulsion bioinks.

**Figure S2.** Similarity between different printed constructs and their corresponding CAD models.


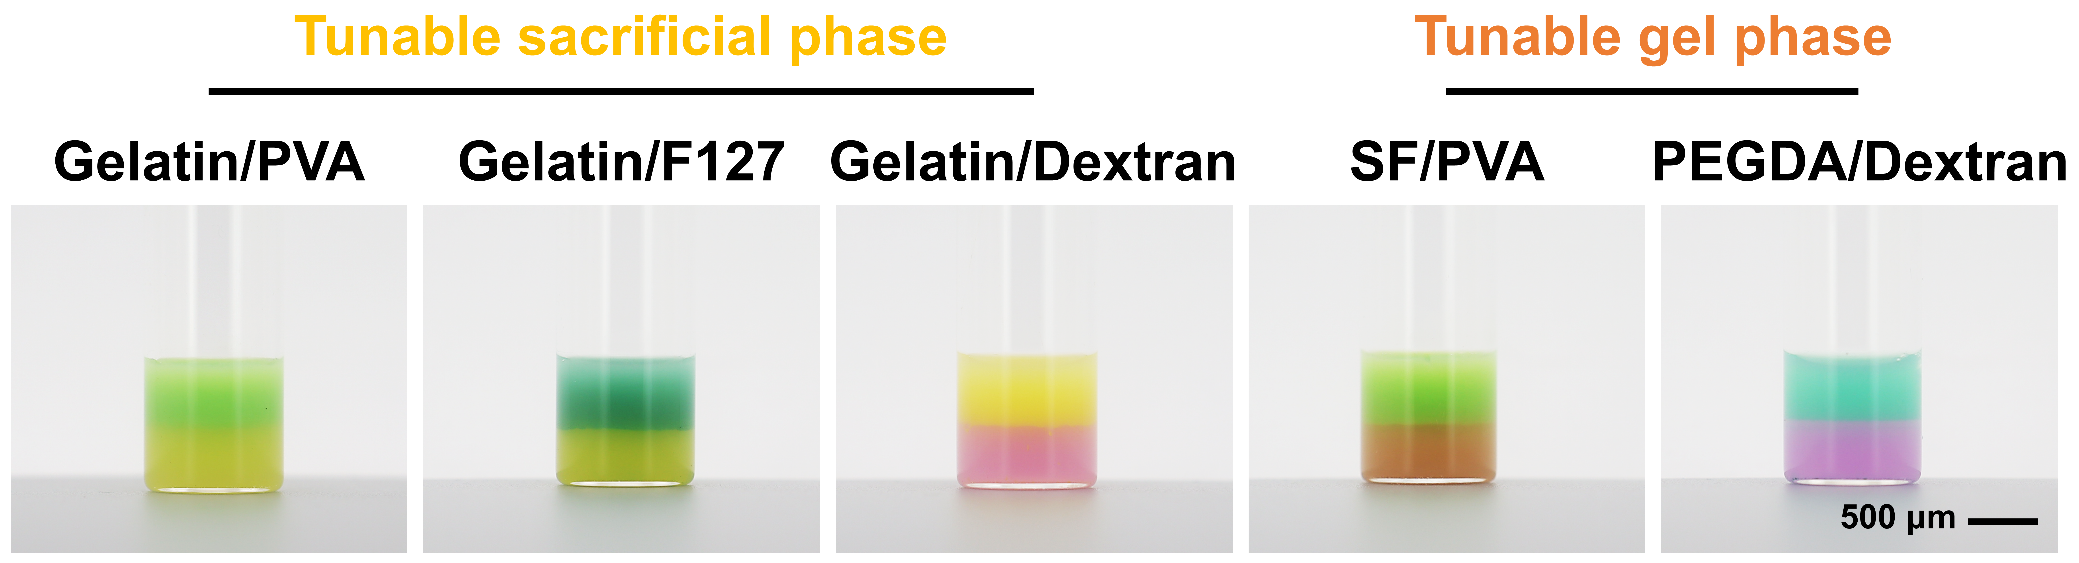


**Figure S3.** Photographs showing macroscopic phase separation of gelatin-based ATPE formulations with different aqueous polymer phases.


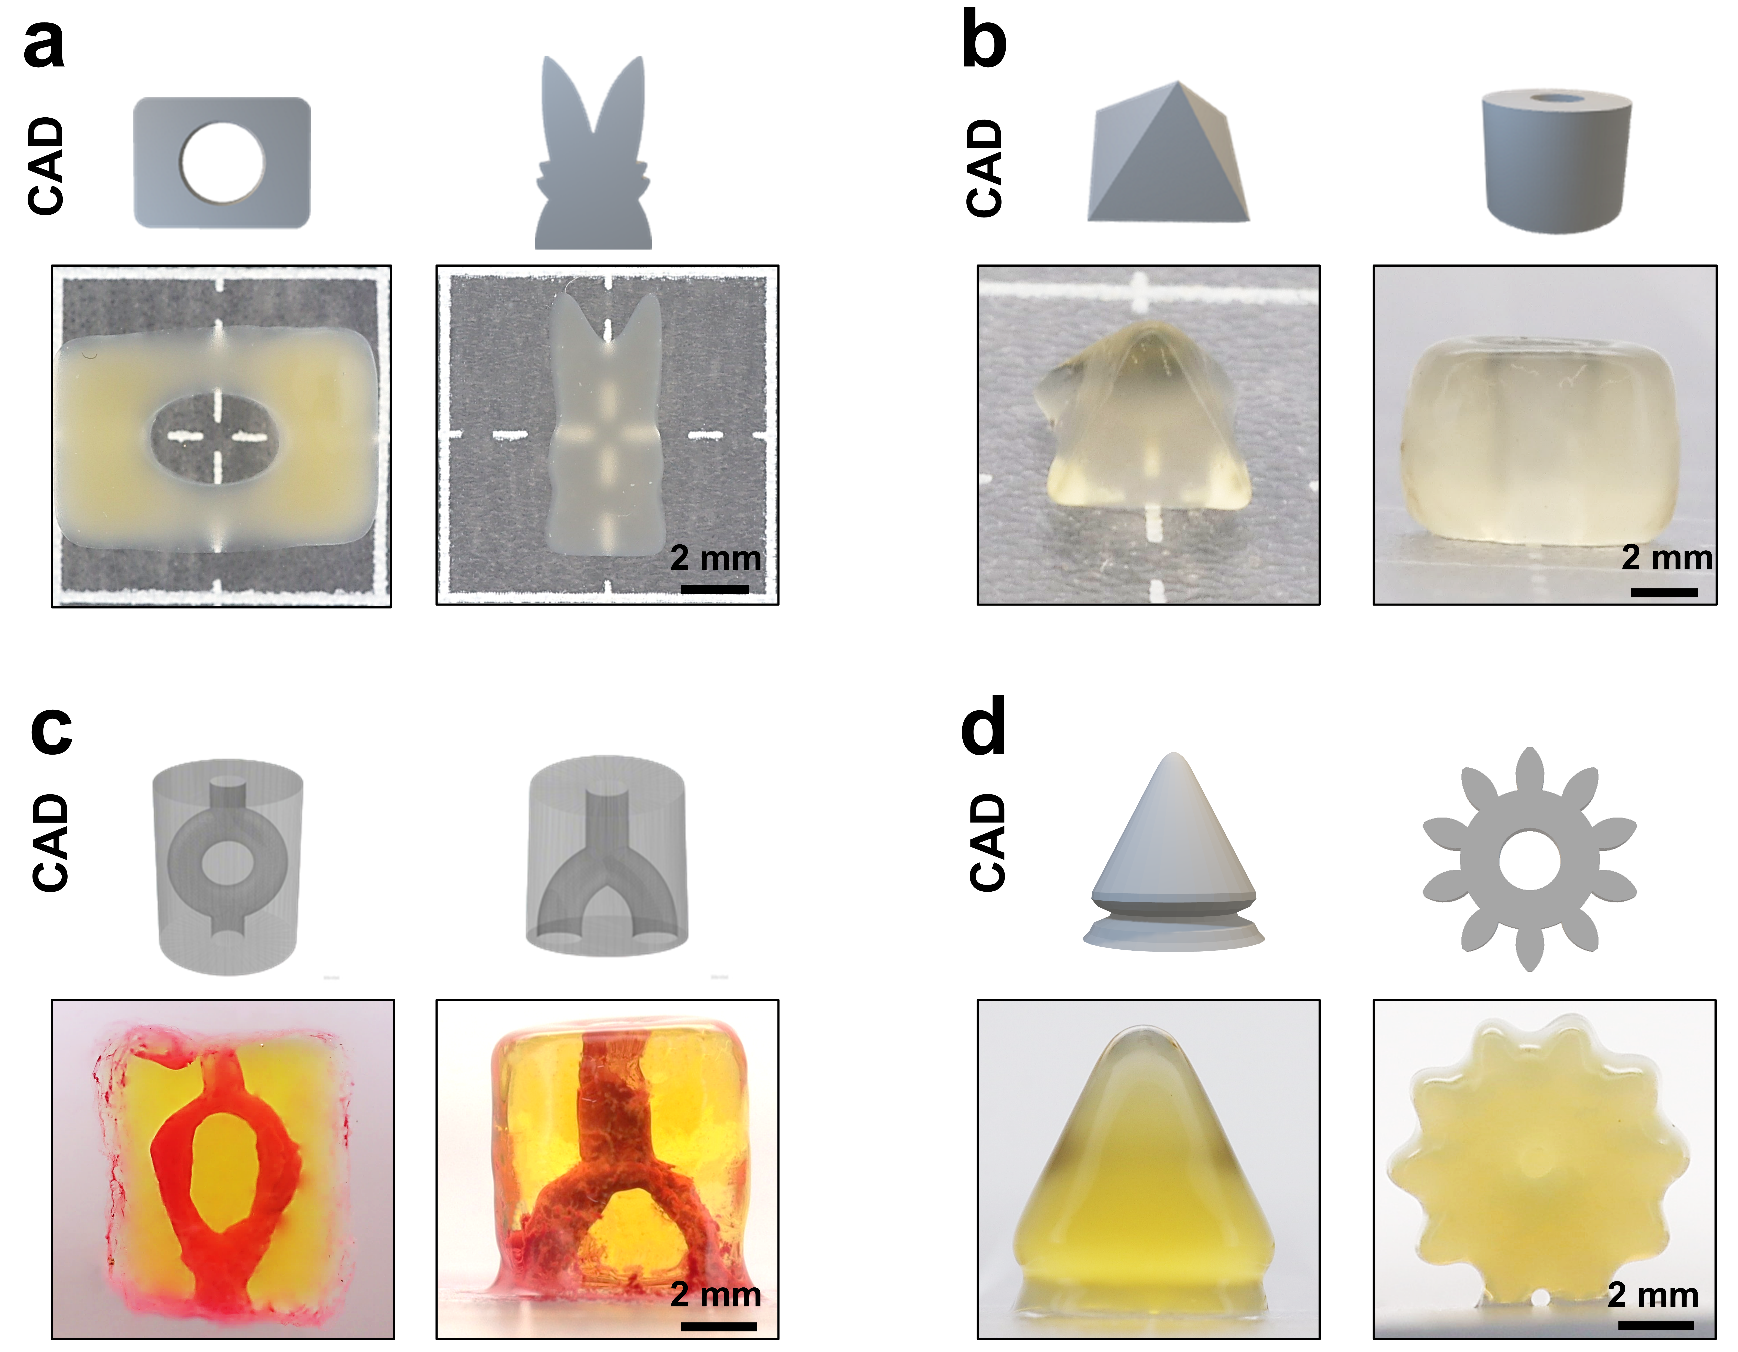


**Figure S4.** VBP printing performance using ATPE-based bioinks. (a) CAD models and photographs of constructs printed from an ATPE bioink composed of 10% gelatin and 10% F-127 at 4:1 (v/v) ratio. (b) CAD models and photographs of constructs printed from an ATPE bioink composed of 10% gelatin and 10% dextran at 4:1 (v/v) ratio. (c) CAD models and photographs of constructs printed from an ATPE bioink composed of 5% SF and 3% PVA at 4:1 (v/v) ratio. (d) CAD models and photographs of constructs printed from an ATPE bioink composed of 10% PEGDA and 5% dextran at 4:1 (v/v) ratio.


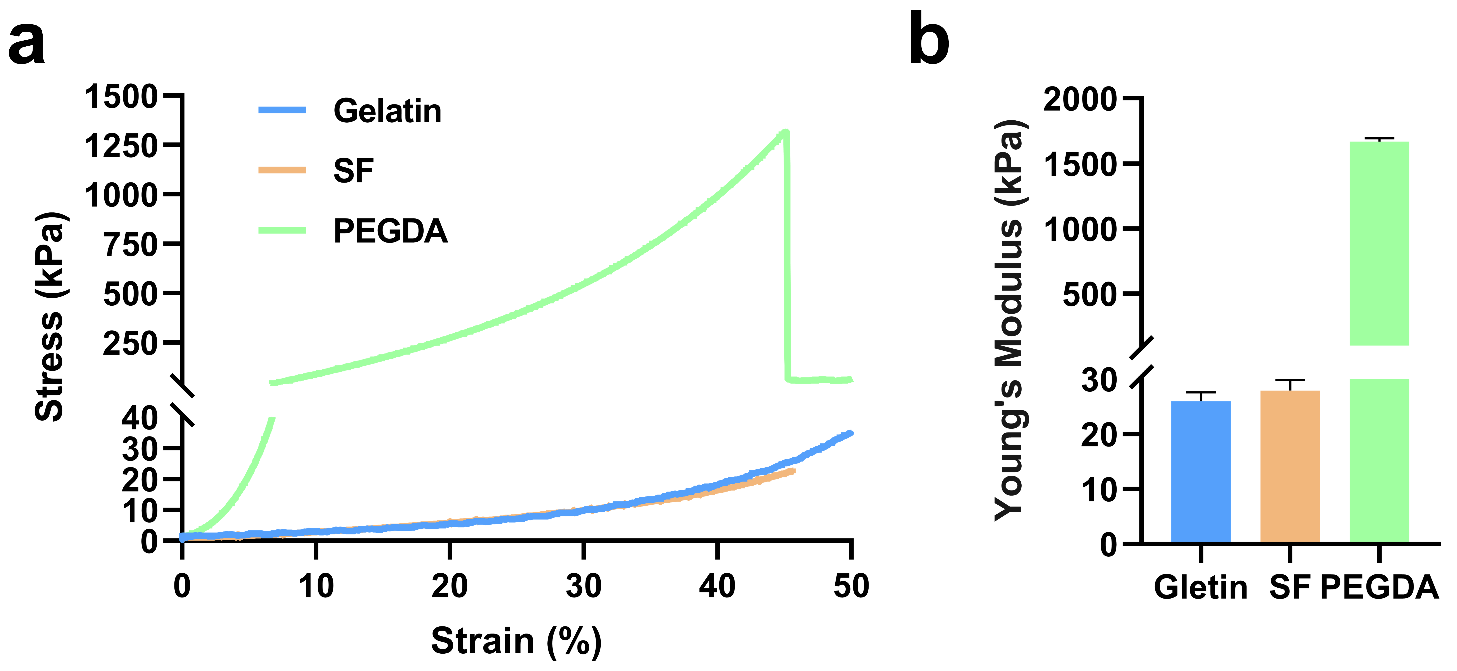


**Figure S5**. Compressive mechanical properties of different hydrogel matrices. (a) Representative stress–strain curves of hydrogels prepared from gelatin, silk fibroin (SF), and PEGDA under uniaxial compression (strain up to 50%). (b) Corresponding Young’s modulus calculated from the initial linear region of the stress–strain curves. Data are presented as mean ± s.d.


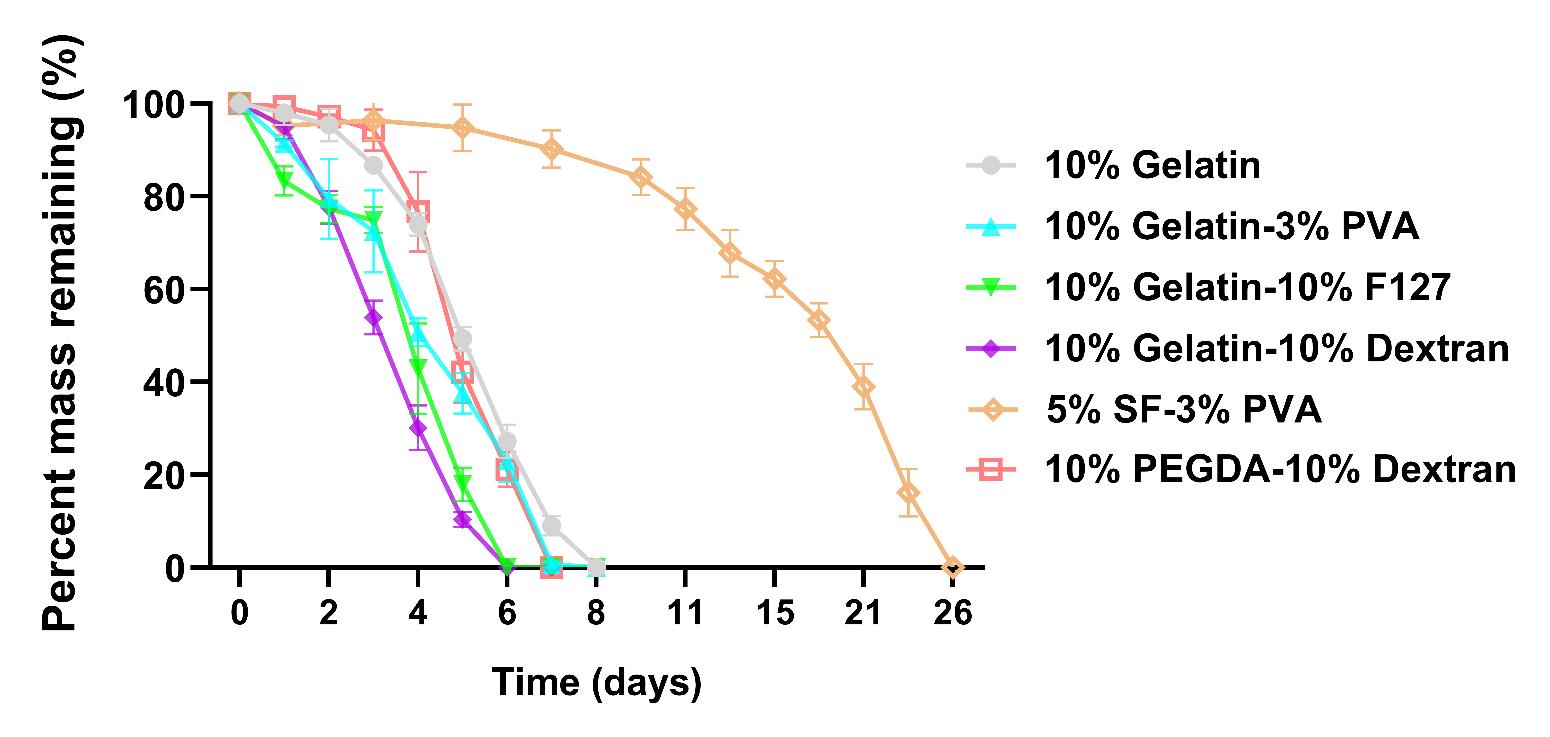


**Figure S6**. In vitro degradation profiles of ATPE-derived hydrogels with different phase compositions. Data are presented as mean ± s.d.


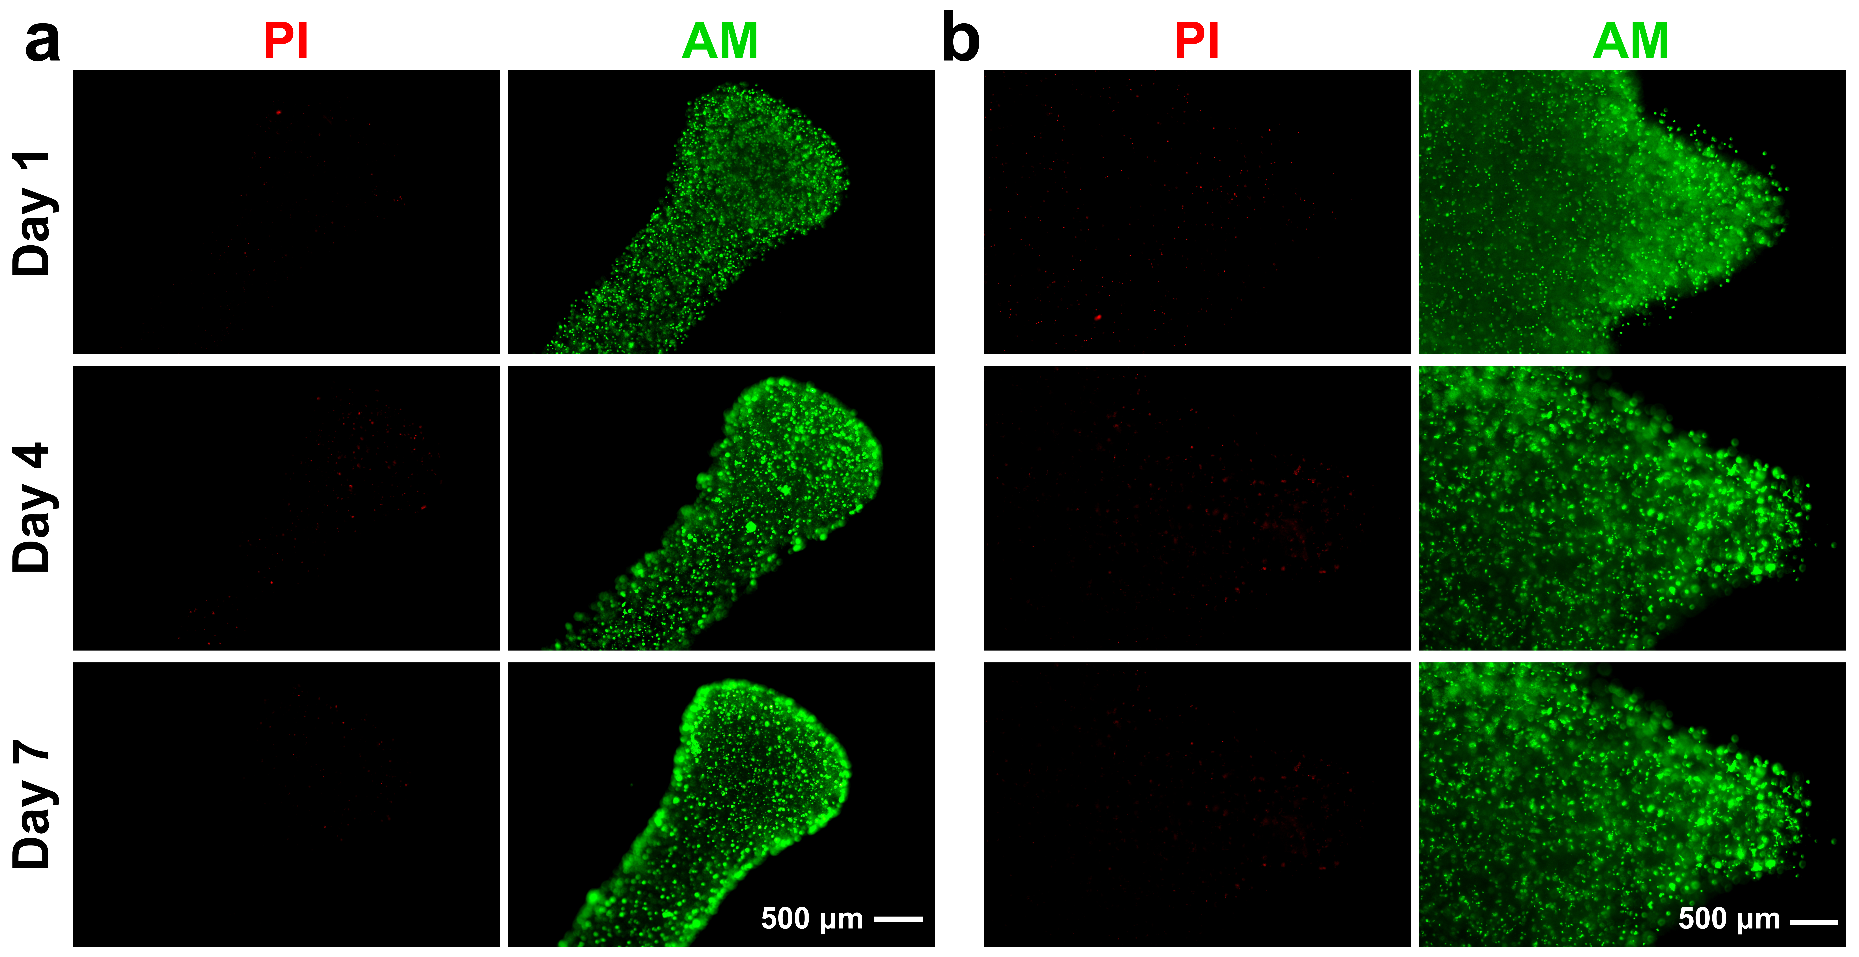


**Figure S7.** Live/Dead staining of 3T3 and H9C2 cells in VBP-fabricated constructs. Representative fluorescence images of 3T3 (a) and H9C2 (b) cell-laden constructs after Live/Dead staining (green = live, red = dead).


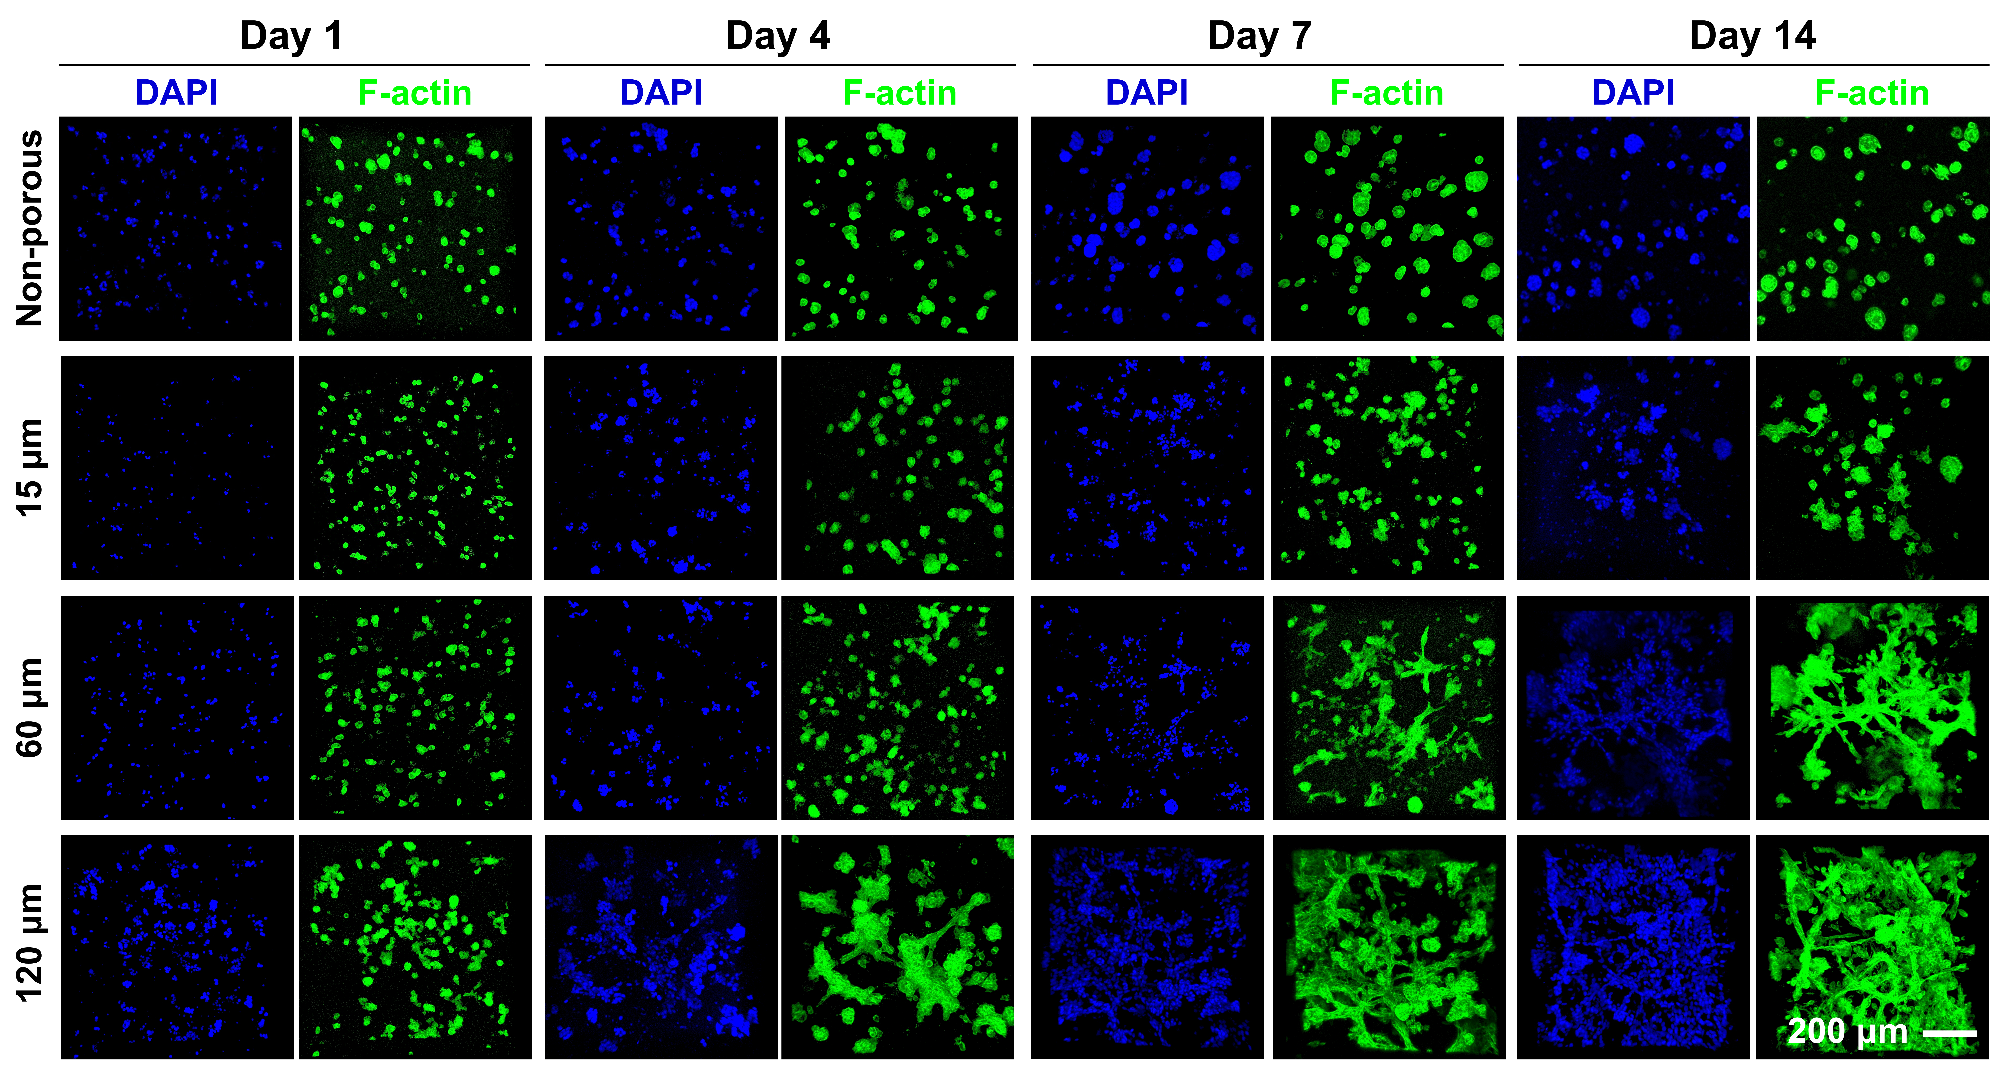


**Figure S8.** Representative split-channel fluorescence images showing F-actin (green) and nuclei (DAPI, blue) of HUVECs cultured on non-porous and porous PVA/gelatin scaffolds with different pore sizes (non-porous, ~15 μm, ~60 μm, and ~120 μm) at days 1, 4, 7, and 14. Scale bar: 200 μm.


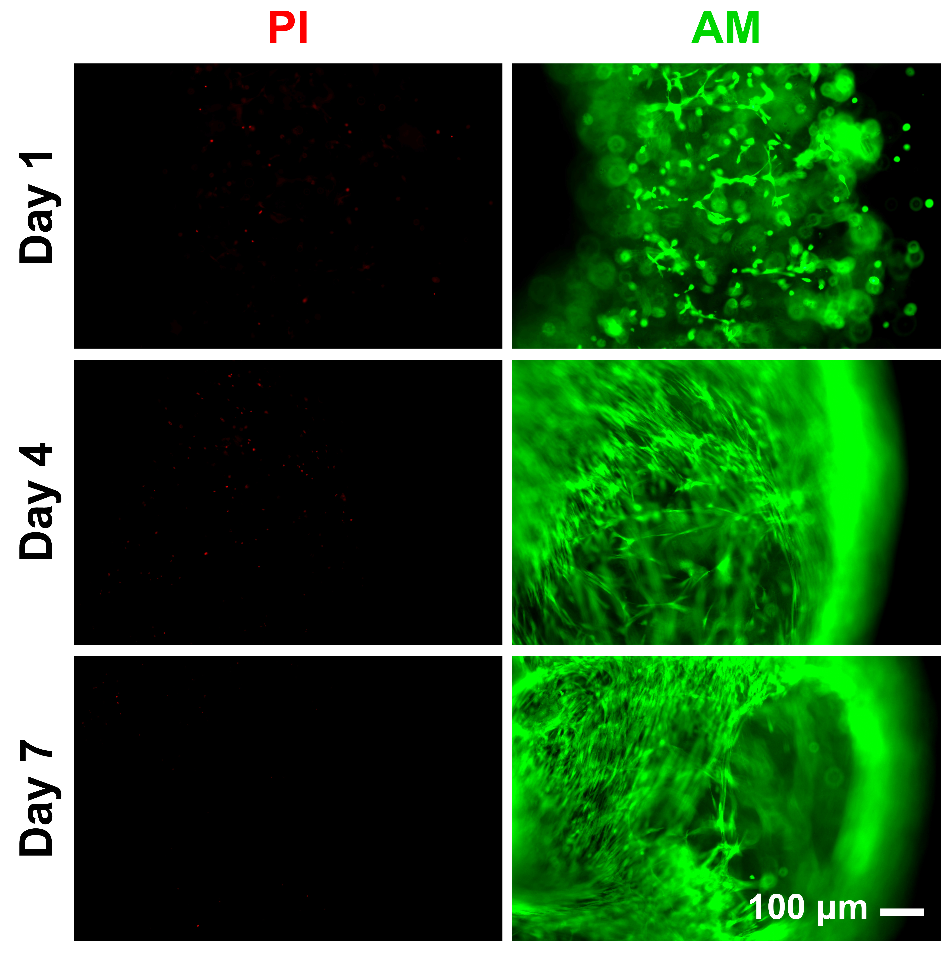


**Figure S9.** Live/Dead staining of ADSC-laden constructs fabricated by VBP (green = live, red = dead).


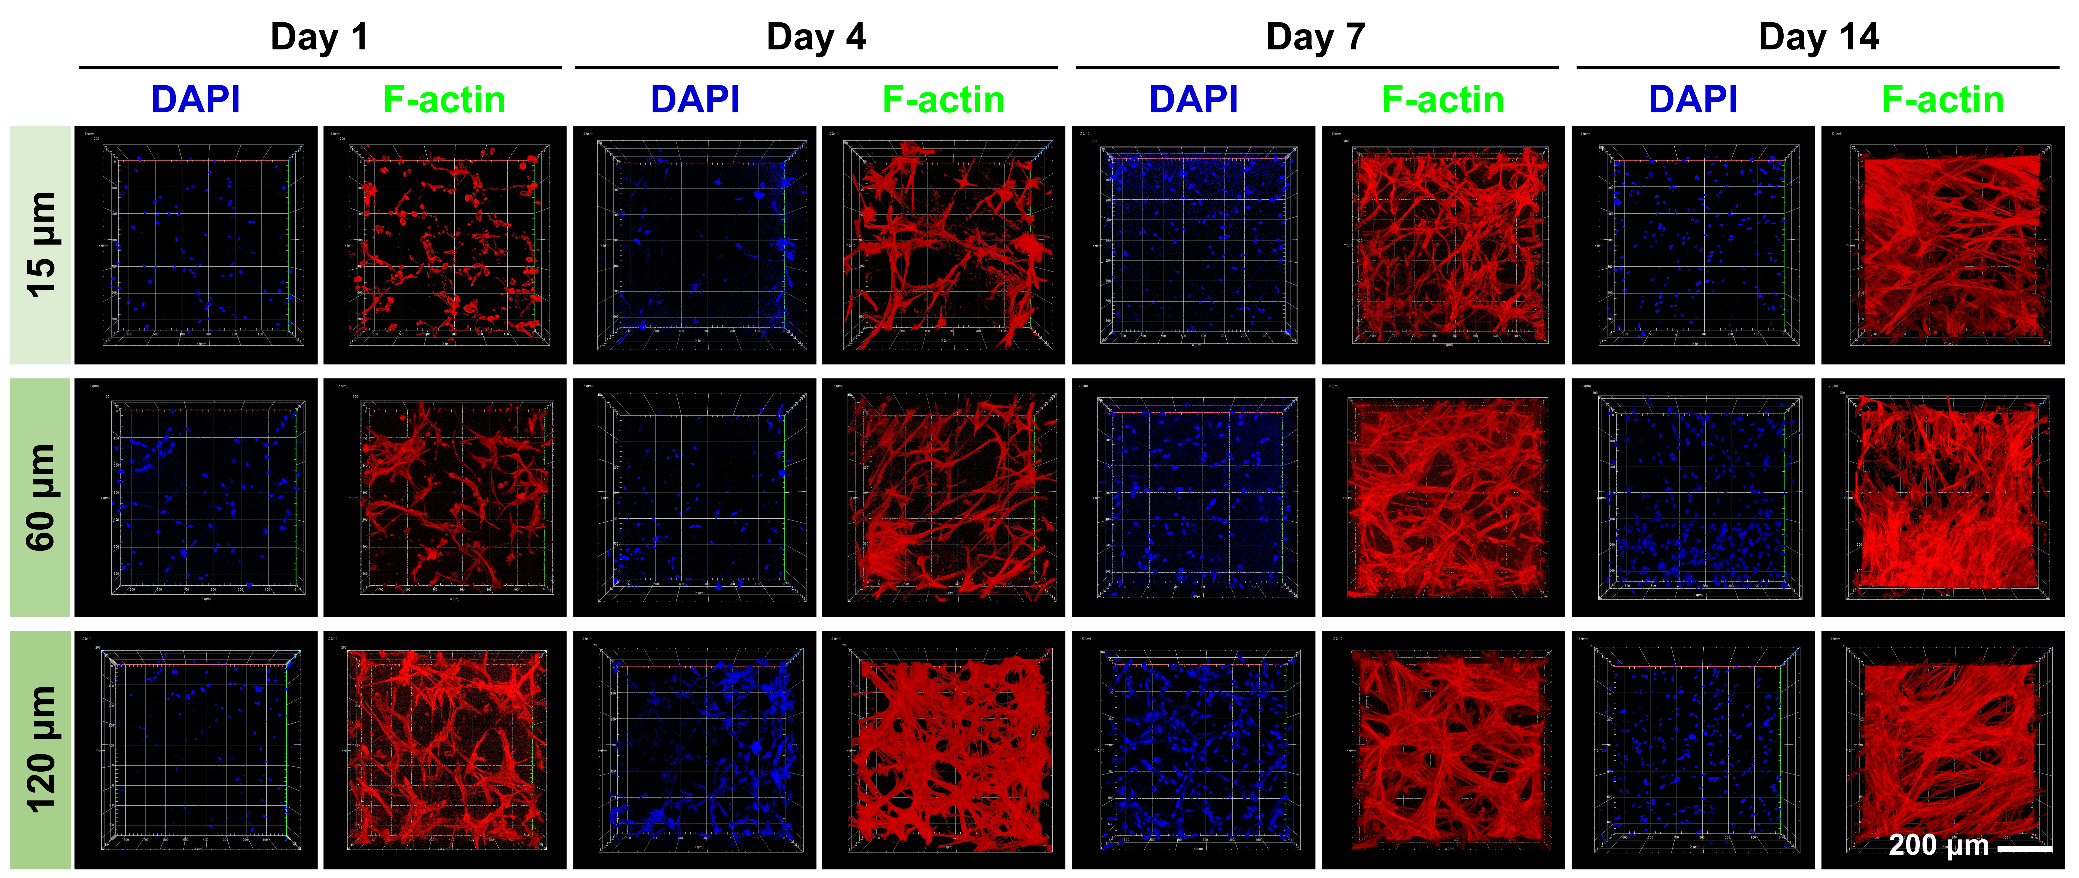


**Figure S10.** Split-channel confocal 3D reconstructions of MSCs cultured in scaffolds with different pore sizes (DAPI: blue; F-actin: Red).


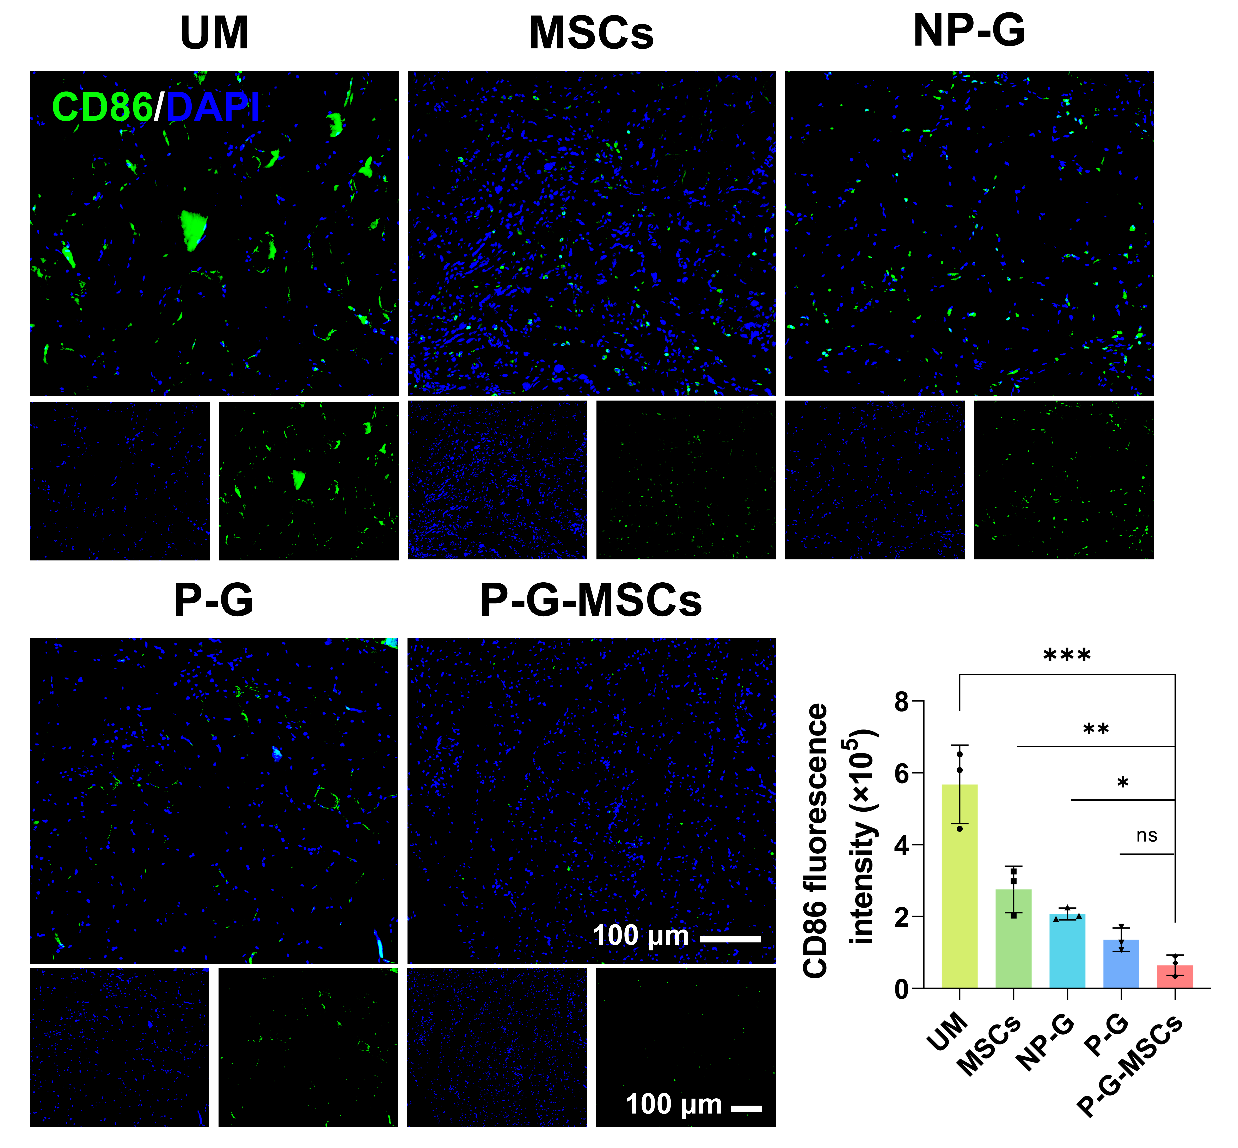


**Figure S11.** Fluorescence microscopy images showingCD86 expression in the TA defect region at 8 weeks after VML treatment. Data are presented as mean ± SD (n = 3 biologically independent samples). ***P < 0.001, **P < 0.002, *P < 0.033, ns: no significant difference, one-way ANOVA.


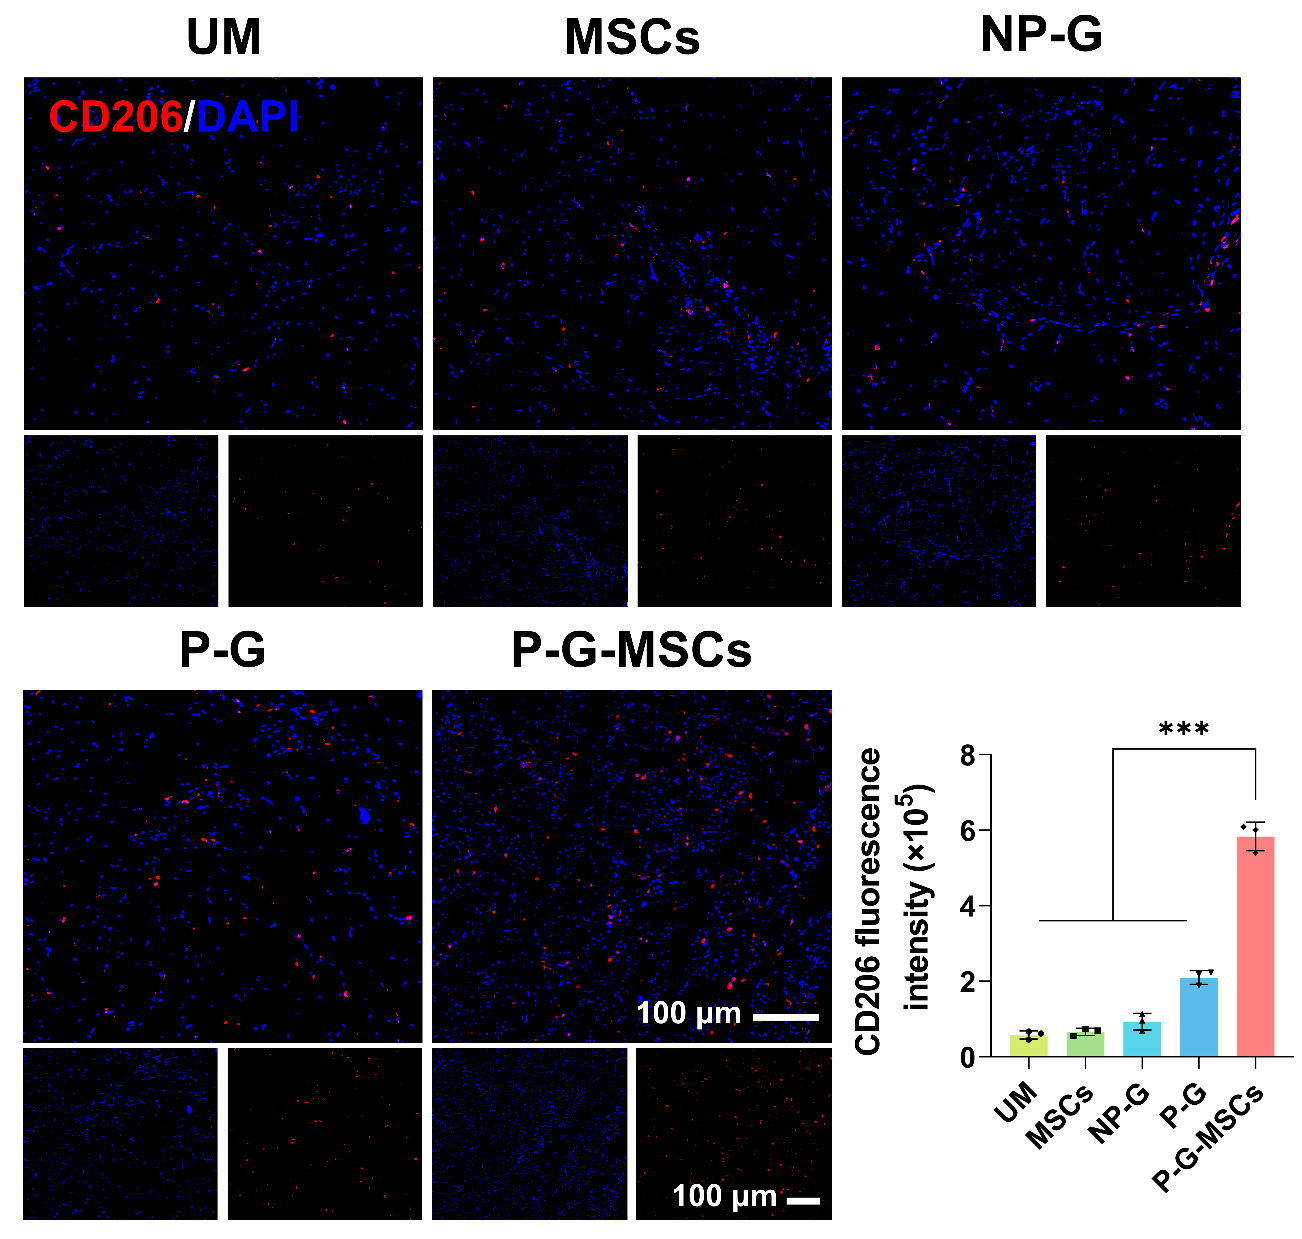


**Figure S12.** Fluorescence microscopy images showingCD206 expression in the TA defect region at 8 weeks after VML treatment. Data are presented as mean ± SD (n = 3 biologically independent samples). ***P < 0.001, **P < 0.002, *P < 0.033, ns: no significant difference, one-way ANOVA.


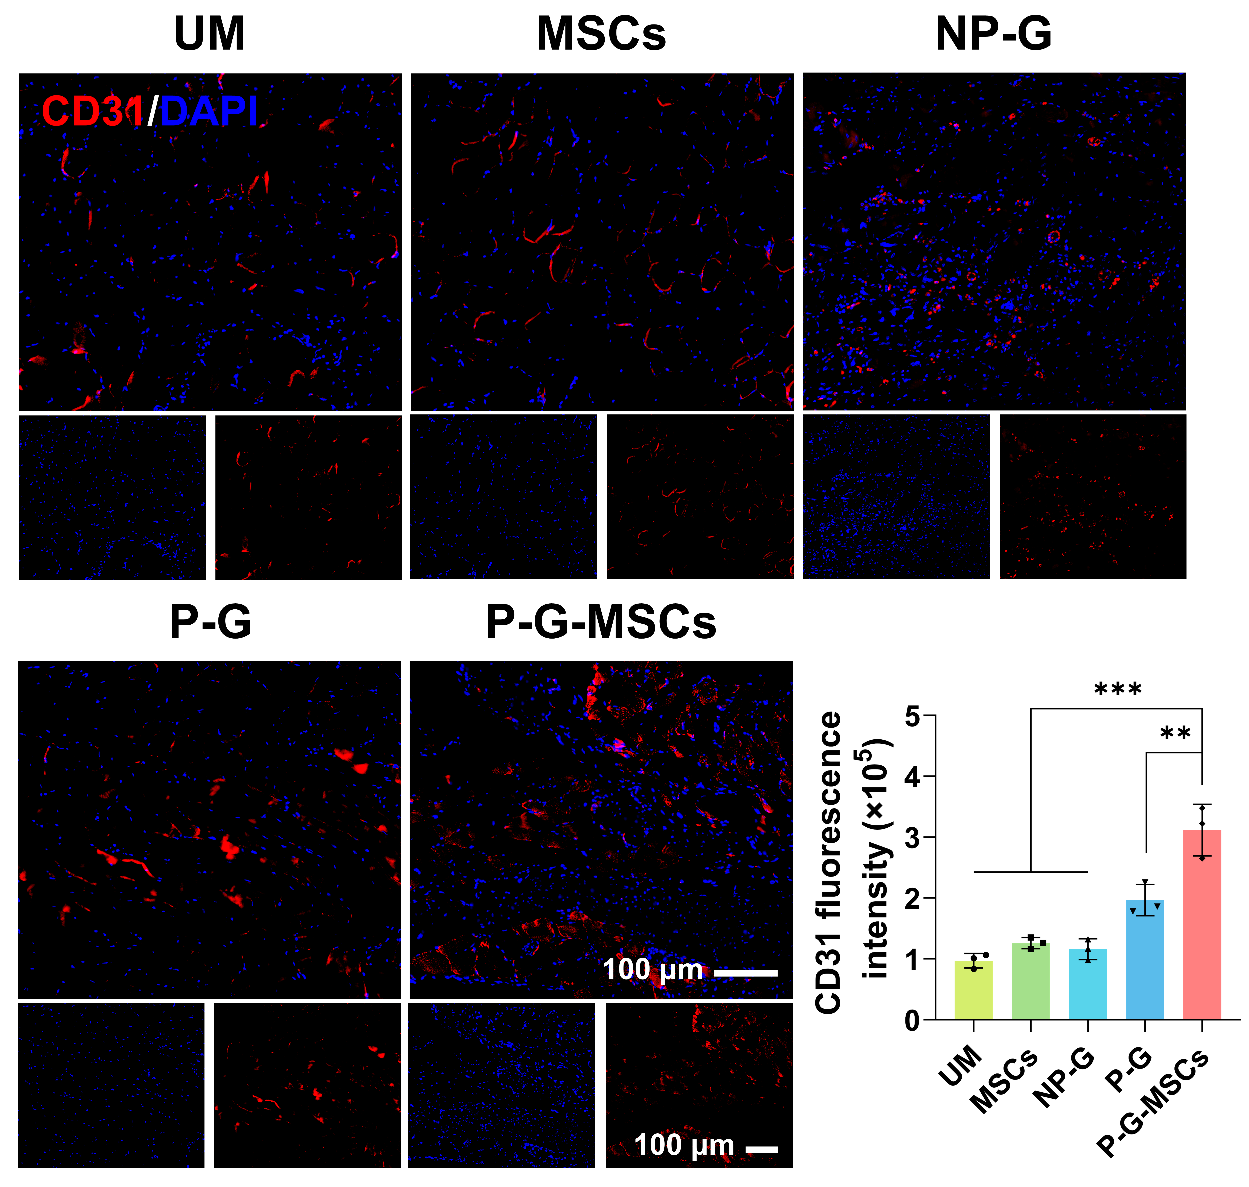


**Figure S13.** Fluorescence images analysis showing CD31 expression in the TA defect region at 8 weeks after VML treatment. Data are presented as mean ± SD (n = 3 biologically independent samples). ***P < 0.001, **P < 0.002, *P < 0.033, ns: no significant difference, one-way ANOVA.


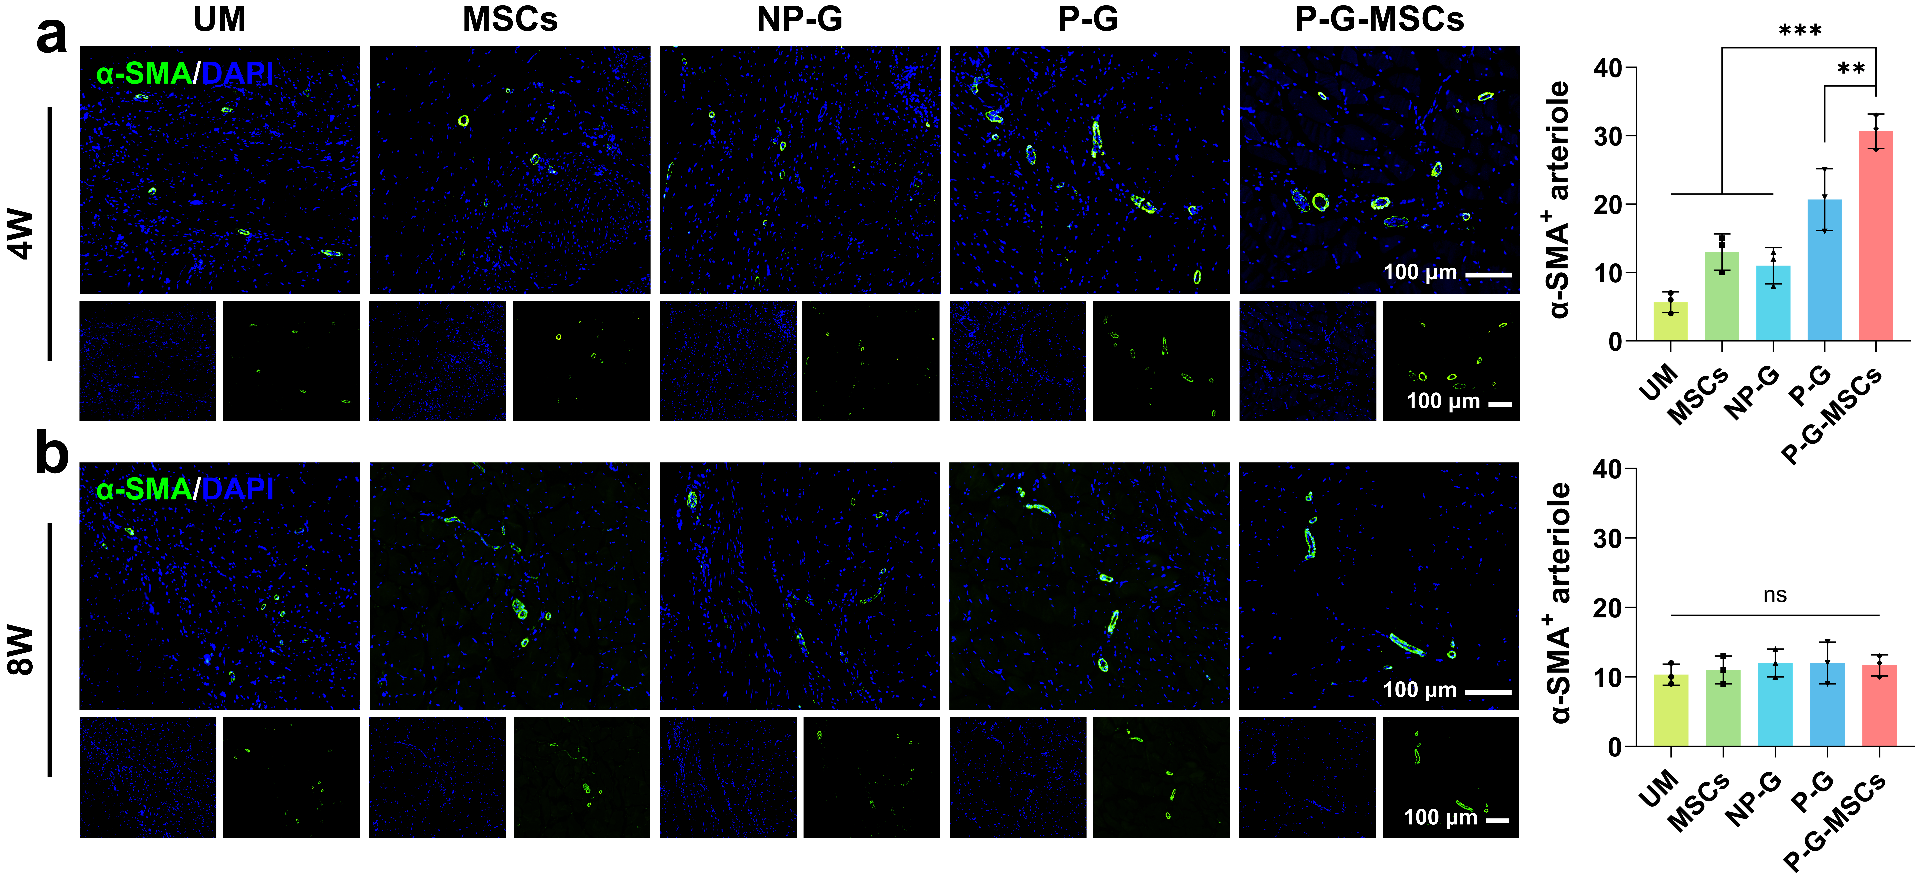


**Figure S14.** Representative α-SMA immunofluorescence staining and quantification of α-SMA⁺ arterioles (mature vessels) in the TA defect region at 4 (a) and 8 (b) weeks after VML treatment. Data are presented as mean ± SD (n = 3 biologically independent samples). ***P < 0.001, **P < 0.002, *P < 0.033, ns: no significant difference, one-way ANOVA.


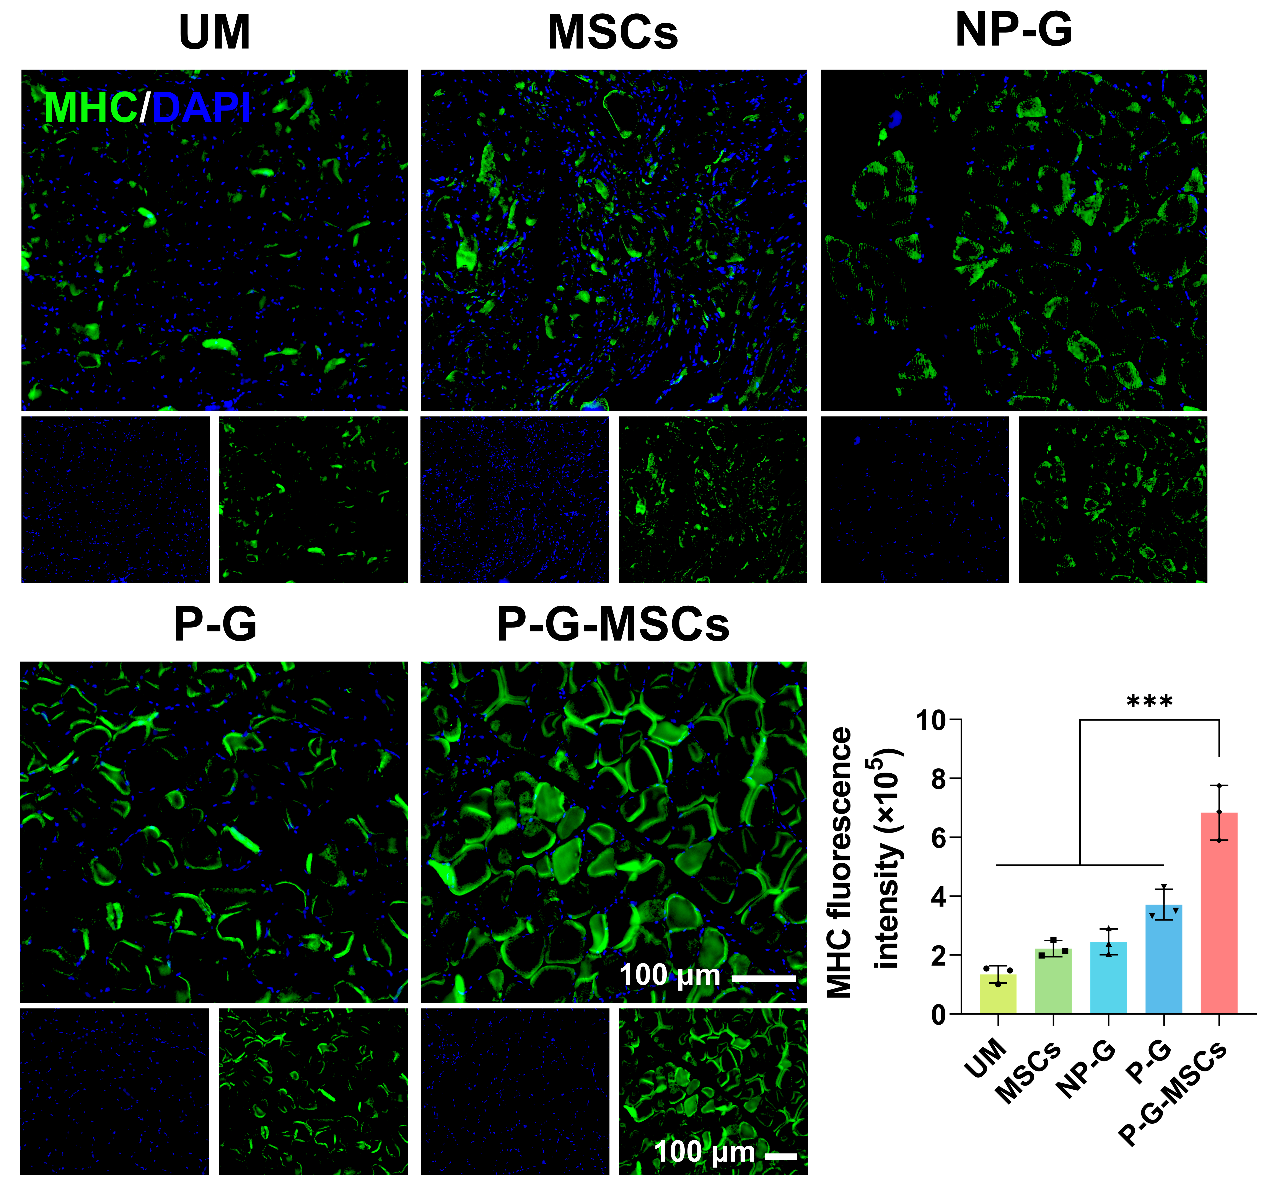


**Figure S15.** Fluorescence images analysis showing MHC expression in the TA defect region at 8 weeks after VML treatment. Data are presented as mean ± SD (n = 3 biologically independent samples). ***P < 0.001, **P < 0.002, *P < 0.033, ns: no significant difference, one-way ANOVA.
